# Supplementary material for: Nontuberculous mycobacteria infection and pulmonary disease in bronchiectasis
Source: PubMed Central journal article supplement — ERJ Open Res. 2022 Dec 12;8(4):00060-2022. doi: 10.1183/23120541.00060-2022 (PMC9835995; doi:10.1183/23120541.00060-2022), 2022-12-12
Supplement: 00060-2022.SUPPLEMENT.pdf [file 00060-2022.SUPPLEMENT.pdf]

## Treatment outcomes

| <b>Outcome</b>              | <b>Description</b>                                                                                                                                                                                                                                                |
|-----------------------------|-------------------------------------------------------------------------------------------------------------------------------------------------------------------------------------------------------------------------------------------------------------------|
| <i>Culture conversion</i>   | The finding of at least three consecutive negative mycobacterial cultures from respiratory samples, collected at least 4 weeks apart, during antimycobacterial treatment (the sampling date of the first negative culture is then the date of culture conversion) |
| <i>Microbiological cure</i> | Finding multiple consecutive negative but no positive cultures with the causative species from respiratory samples after culture conversion and until the end of antimycobacterial treatment                                                                      |
| <i>Clinical cure</i>        | Patient-reported and/or objective improvement of symptoms during antimycobacterial treatment sustained until at least the end of treatment, but no cultures available to prove culture conversion or microbiological cure                                         |
| <i>Cure</i>                 | Antimycobacterial treatment completed, with the fulfillment of criteria for both microbiological and clinical cure                                                                                                                                                |
| <i>Treatment failure</i>    | The re-emergence of multiple positive cultures or persistence of positive cultures with the causative species from respiratory samples after $\geq 12$ months of antimycobacterial treatment, while the patient is still on treatment                             |
| <i>Recurrence</i>           | The re-emergence of at least two positive cultures with the causative species from respiratory samples after cessation of                                                                                                                                         |

|                           |                                                                                                                                                                                   |
|---------------------------|-----------------------------------------------------------------------------------------------------------------------------------------------------------------------------------|
|                           | antimycobacterial treatment                                                                                                                                                       |
| <i>Relapse</i>            | The emergence of at least two positive cultures with the same strain of the causative species after the end of treatment                                                          |
| <i>Reinfection</i>        | The emergence of at least two positive cultures with a different strain of the causative species or a strain of a different species after the initiation of the treatment episode |
| <i>Died</i>               | Death due to any reason, but during NTM-PD treatment                                                                                                                              |
| <i>Died due to NTM-PD</i> | All causes of death that would not have occurred if the patient had not had pulmonary NTM disease                                                                                 |
| <i>Treatment halted</i>   | Physician- or patient-initiated pre-term cessation of antimycobacterial treatment                                                                                                 |
| <i>Unknown outcome</i>    | The patient is no longer seen by his/her treating physician, so follow-up of treatment outcome is not possible (an umbrella term for "lost to follow-up" and "transfer out")      |
